# Supplementary material for: Virtual Acute Psychiatric Ward: Evaluation of Outcomes and Cost Savings
Source: Atypon-hosted journal article supplement (doi:10.1176/appi.ps.20220332), 2023-04-05
Supplement: appi.ps.20220332.ds001.pdf [file appi.ps.20220332.ds001.pdf]

Estimated hospital length of stay by Canadian Institute for Health Information (CIHI) diagnostic group and corresponding usual care cost

| CIHI diagnostic group                                          | Age group | No. of cases | eLOS Hospital (days/ person) | Cost/case (2018 CAD) | Total Cost (2018 CAD) | No. hospitalized from vWARD | Total days hospitalized    |
|----------------------------------------------------------------|-----------|--------------|------------------------------|----------------------|-----------------------|-----------------------------|----------------------------|
| Organic Mental Disorder                                        | 18-59     | 1            | 11.8                         | 11,904               | 11,904                | 0                           | 0                          |
| Miscellaneous Mental Disorder                                  | 18-59     | 2            | 6.3                          | 6,888                | 13,776                | 0                           | 0                          |
| Schizotypal/Delusional Disorder                                | 18-59     | 1            | 14.5                         | 8,729                | 8,729                 | 1                           | 8                          |
| Schizotypal/Delusional Disorder                                | 60-79     | 1            | 18.9                         | 9,232                | 9,232                 | 1                           | 27                         |
| Disorder of Adult Personality Behaviour                        | 18-59     | 11           | 7.9                          | 4,330                | 47,630                | 1                           | 16                         |
| Disorder of Adult Personality Behaviour                        | 60-79     | 1            | 9.2                          | 4,204                | 4,204                 | 0                           | 0                          |
| Obsessive Compulsive Disorder                                  | 18-59     | 3            | 26.9                         | 13,175               | 39,525                | 0                           | 0                          |
| Somatoform/Dissociative Disorder                               | 18-59     | 2            | 6.3                          | 5,186                | 10,372                | 0                           | 0                          |
| Anxiety Disorder                                               | 18-59     | 8            | 6.8                          | 5,023                | 40,184                | 0                           | 0                          |
| Stress Reaction/Adjustment Disorder                            | 18-59     | 27           | 5.2                          | 3,632                | 98,064                | 1                           | 2                          |
| Stress Reaction/Adjustment Disorder                            | 60-79     | 2            | 6.1                          | 3,962                | 7,924                 | 0                           | 0                          |
| Stress Reaction/Adjustment Disorder                            | 80+       | 1            | 15.3                         | 5,724                | 5,724                 | 0                           | 0                          |
| Bipolar Disorder                                               | 18-59     | 15           | 19.1                         | 11,517               | 172,755               | 6                           | 81                         |
| Depressive Episode                                             | 18-59     | 34           | 11.4                         | 7,384                | 251,056               | 3                           | 40                         |
| Depressive Episode                                             | 60-79     | 2            | 16.9                         | 7,762                | 15,524                | 0                           | 0                          |
| Substance Abuse with Withdrawal and Delirium                   | 18-59     | 1            | 8.1                          | 10,016               | 10,016                | 0                           | 0                          |
| Substance Abuse with Residual/Late Onset/Psychotic Disorder    | 18-59     | 4            | 7.4                          | 4,401                | 17,604                | 1                           | 7                          |
| Schizophrenia/Schizoaffective Disorder                         | 18-59     | 15           | 21                           | 14,569               | 218,535               | 3                           | 26                         |
| <b>Total/Mean</b>                                              |           | <b>131</b>   | <b>12.2</b>                  | <b>7,646.6</b>       | <b>982,758</b>        | <b>17</b>                   | <b>207</b>                 |
| <b>Value in 2021 Canadian Dollars (adjusted for inflation)</b> |           |              |                              | <b>8,118.4</b>       | <b>1,043,394</b>      |                             | <b>132,843<sup>a</sup></b> |

*Note.* The number of individuals actually hospitalized from the virtual ward (vWARD) along with the total days in hospital are also indicated.

eLOS: estimated length of stay in hospital, based on CIHI data for same primary diagnosis

<sup>a</sup>Calculated using the average cost /day of a hospital stay for the same diagnosis multiplied by the number of days hospitalized
